# Supplementary material
Source: Springer Nature journal article supplement (https://www.springermedizin.de/resource/supplementary/12882_2013_765_MOESM7_ESM.pdf/9454670)
Supplement: MOESM7 [file 9454670]

**Additional Table 1. Change from baseline to week 12 in secondary and tertiary variables**

|                                                                         | Lanthanum carbonate<br>(n = 17) |                                                                | Placebo<br>(n = 12)             |                                                             | p value |
|-------------------------------------------------------------------------|---------------------------------|----------------------------------------------------------------|---------------------------------|-------------------------------------------------------------|---------|
|                                                                         | Baseline value,<br>mean (SD)    | Change from<br>baseline to<br>endpoint<br>(LOCF), mean<br>(SD) | Baseline<br>value, mean<br>(SD) | Change from<br>baseline to<br>endpoint (LOCF),<br>mean (SD) |         |
| cFGF23, RU/ml                                                           | 188.76 (247.09)                 | -24.16 (43.57)                                                 | 130.54 (62.39)                  | -3.11 (40.98)                                               | 0.2068  |
| iPTH, pg/ml                                                             | 69.4 (30.4)                     | 2.1 (12.1)                                                     | 75.8 (43.9)                     | -5.5 (22.6)                                                 | 0.2995  |
| 1,25-dihydroxyvitamin D, pg/ml                                          | 43.2 (1709)                     | 0.1 (12.2)                                                     | 51.1 (11.4)                     | -9.5 (19.6)                                                 | 0.3252  |
| Serum phosphate, mmol/l                                                 | 1.01 (0.18)                     | 0.01 (0.18)                                                    | 1.05 (0.13)                     | 0.03 (0.12)                                                 | 0.6134  |
| Serum total calcium, mmol/l                                             | 2.36 (0.14)                     | 0.03 (0.17)                                                    | 2.38 (0.10)                     | -0.01 (0.13)                                                | 0.5636  |
| Serum calcium × phosphate<br>product, mmol <sup>2</sup> /l <sup>2</sup> | 2.37 (0.43)                     | 0.07 (0.35)                                                    | 2.50 (0.30)                     | 0.06 (0.33)                                                 | 0.9220  |
| Urinary fractional phosphate<br>excretion, %                            | 27.0 (10.1)                     | -6.8 (6.8)                                                     | 24.2 (12.3)                     | -0.7 (5.7)                                                  | 0.1459  |

|                                                        |                 |               |                    |                |        |
|--------------------------------------------------------|-----------------|---------------|--------------------|----------------|--------|
| 24-h urinary calcium excretion, mmol <sup>a</sup>      | 1.87 (0.77)     | -0.10 (0.72)  | 1.43 (0.66)        | 0.96 (1.29)    | 0.0371 |
| 24-h urinary phosphate excretion, mmol <sup>b</sup>    | 18.2 (6.8)      | -3.7 (8.3)    | 16.2 (9.1)         | 4.0 (5.1)      | 0.0162 |
| Urine creatinine, mmol/l <sup>b</sup>                  | 6.26 (3.54)     | -0.22 (1.75)  | 5.61 (1.95)        | -0.33 (1.39)   | 0.6688 |
| Urine urea nitrogen concentration, mmol/l <sup>b</sup> | 163.0 (63.8)    | 7.8 (41.0)    | 182.1 (83.8)       | -10.1 (57.8)   | 0.5127 |
| 25-hydroxyvitamin D, ng/ml                             | 39.9 (14.1)     | -10.1 (6.5)   | 40.2 (7.0)         | -11.3 (9.8)    | 0.6649 |
| Ionized calcium, mmol/l <sup>c</sup>                   | 1.212 (0.044)   | 0.012 (0.049) | 1.220 (0.029)      | -0.004 (0.028) | 0.4283 |
| CrossLaps <sup>®</sup> , pmol/l                        | 3833.5 (2083.1) | 347.4 (821.2) | 3761.9<br>(2087.9) | 178.9 (867.8)  | 0.5793 |
| Bone-specific alkaline phosphatase, ng/ml              | 12.1 (3.2)      | 0.8 (2.0)     | 11.4 (3.7)         | 0.0 (2.4)      | 0.2613 |
| Serum creatinine, mmol/l                               | 158.9 (48.4)    | -1.9 (16.1)   | 127.1 (42.9)       | -3.7 (12.6)    | 0.2879 |
| iGFR, ml/min/1.73 m <sup>2</sup>                       | 42.2 (10.1)     | -0.2 (4.9)    | 48.0 (13.1)        | -0.2 (10.4)    | 0.5105 |

---

p values from ANCOVA models using change from baseline of least-squares mean values at week 12 with treatment group as a factor and the corresponding value at baseline as a covariate.

<sup>a</sup>Two patients missing from the placebo group and one from the lanthanum carbonate group at baseline and endpoint.

<sup>b</sup>One patient missing from the placebo group at baseline and endpoint.

<sup>c</sup>One patient missing from the placebo group at baseline and two at endpoint.

ANCOVA, analysis of covariance; cFGF23, C-terminal fibroblast growth factor 23; iGFR, iohexol glomerular filtration rate; iPTH, intact parathyroid hormone; LOCF, last observation carried forward; SD, standard deviation.
